# Supplementary material
Source: publisher site journal article supplement (https://www.dovepress.com/get_supplementary_file.php?f=323381.docx)
Supplement: Supplementary file 1 [file get_supplementary_file.php]

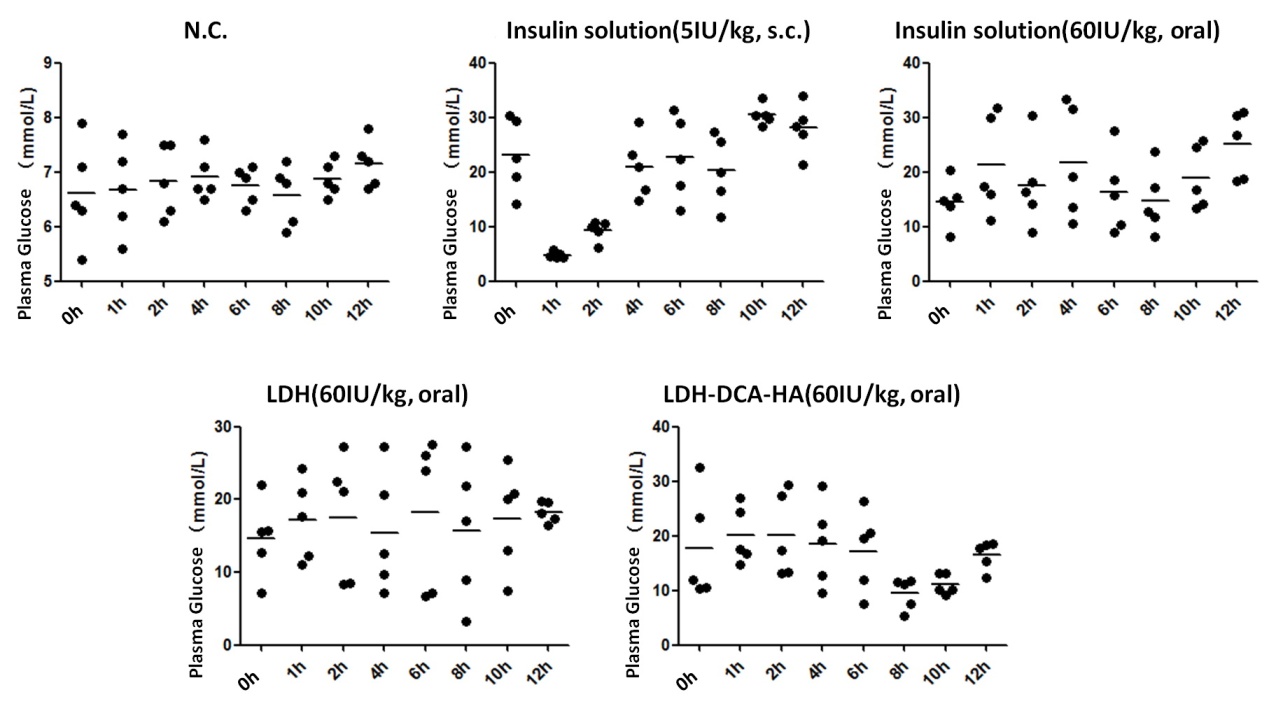


**Figure S1.** Hypoglycemic effect of insulin delivered by LDH and LDH-DCA-HA via oral drug delivery(expressed by plasma glucose concentration)
